# Supplementary material
Source: PubMed Central journal article supplement (PMC3677100)
Supplement: NIHMS53426-supplement-Supplemental_Wilflingseder_TP2013.pdf [file NIHMS53426-supplement-Supplemental_Wilflingseder_TP2013.pdf]

## SUPPLEMENTAL DIGITAL CONTENT (SDC)

### Table of Contents

|                                               |    |
|-----------------------------------------------|----|
| Workflow of comparative pathway analysis..... | 2  |
| mRNA datasets for comparative analysis .....  | 2  |
| qRT-PCR validation .....                      | 6  |
| References .....                              | 10 |

## **Workflow of comparative pathway analysis**

After miRNA profiling and statistical work-up comparing control and study groups, target genes of the identified differentially regulated miRNAs were determined utilizing various prediction models as well as experimentally verified targets, complemented by further functional characterization on the molecular process level. For allowing comparative analysis on the molecular process and pathway level the same bioinformatics procedures were applied for differentially regulated mRNAs derived from patients developing acute rejection or delayed graft function. Pathways identified as affected on both, direct mRNA and miRNA target level were used for functional interpretation.

## **mRNA datasets for comparative analysis**

A gene expression dataset of post-transplant biopsies is publicly available for download in the Gene Expression Omnibus (GEO) at NCBI with the identification GSE1563 as published by Flechner et al. (1). The dataset covers 23 gene expression profiles from post-transplant biopsies for the following groups: Samples from patients with well-functioning transplants with no clinical evidence of rejection (PBx, n = 10), samples from transplant patients with kidneys undergoing acute rejection (combining AREJ and ABMR, n=7), and samples from transplant patients with renal allograft dysfunction without rejection (n=5; 2 CNI toxicity, 2 ATN, 1 focal segmental glomerulosclerosis). We re-analyzed the Affymetrix raw datafiles by utilizing the Bioconductor package SimpleAffy to assess data quality (2), followed by preprocessing, normalization, and annotation using the robust multi-average (RMA) method and quantile normalization as implemented in the Bioconductor packages affy, gcrma and annaffy (3). Significance Analysis of Microarray (SAM) was used to evaluate differences between control and study groups. Genes with a fold change of 2 or higher and a delta value of 3.5 was considered as differentially regulated between groups and used for further analysis.

Saint-Mezard et al. published an analysis of independent microarray datasets of renal allograft biopsies (1, 4, 5) revealing an acute rejection transcript set(ARTS) consisting of 70 unique genes (4), subsequently also used as reference mRNA data set.

The Edmonton data set (Müller et al. (6)) covering gene expression profiles of 28 biopsies for T-cell-mediated rejection, 8 biopsies characterized by antibody mediated rejection, and 72 biopsies without sign of rejection were additionally included in our comparative analysis. Microarray raw data files are available at <http://transplants.med.ualberta.ca>. We used the same bioinformatics workflow for identification of differentially regulated genes as applied for the Cleveland dataset (Flechner et al. (1)). Significance Analysis of Microarray (SAM) was used to evaluate differences between control and study groups. Genes with a fold change of 2 or higher and a delta value of 2 were considered as differentially regulated between groups. This dataset allowed us to separately analyse acute cellular rejection (AREJ) and antibody mediated rejection (ABMR) as also derived on the level of miRNA profiles.

**Table S1.** Number of predicted targets (DIANAmT, miRanda and Targetscan), number of experimentally validated targets (miRTarBase) of significantly differentially regulated miRNAs. The number in bracket indicates the no. of unique genes.

|                                                  | miRNA           | No. of predicted targets | No. of experimentally verified targets |
|--------------------------------------------------|-----------------|--------------------------|----------------------------------------|
| <b>DGF versus PBx</b>                            |                 |                          |                                        |
| up-regulated                                     | hsa-miR-182     | 2305                     | 9                                      |
|                                                  | hsa-miR-106b    | 2976                     | 16                                     |
|                                                  | hsa-miR-20a     | 2960                     | 26                                     |
|                                                  | hsa-miR-21*     | 0                        | 0                                      |
|                                                  | hsa-miR-18a     | 1402                     | 16                                     |
|                                                  | hsa-miR-17      | 2588                     | 39                                     |
|                                                  | hsa-miR-106a    | 2664                     | 10                                     |
| <b>delayed graft function</b>                    |                 | <b>14895 (5320)</b>      | <b>116 (67)</b>                        |
| <b>AREJ versus PBx</b>                           |                 |                          |                                        |
| up-regulated                                     | hsa-miR-150     | 3133                     | 5                                      |
|                                                  | hsa-miR-155     | 1600                     | 161                                    |
|                                                  | hsa-miR-663a    | 1145                     | 2                                      |
|                                                  | hsa-miR-638     | 295                      | 0                                      |
| acute cellular rejection (up-regulated miRNAs)   |                 | 6173 (4960)              | 168 (167)                              |
| down-regulated                                   | hsa-miR-138     | 1634                     | 11                                     |
|                                                  | hsa-miR-125a    | 2354                     | 16                                     |
|                                                  | hsa-miR-455     | 1473                     | 0                                      |
|                                                  | hsa-miR-30c-2*  | 0                        | 0                                      |
|                                                  | hsa-miR-574-3p  | 261                      | 0                                      |
|                                                  | hsa-miR-502-3p  | 968                      | 0                                      |
|                                                  | hsa-miR-181b    | 2339                     | 12                                     |
|                                                  | hsa-miR-99b     | 105                      | 1                                      |
|                                                  | hsa-miR-139-5p  | 1710                     | 0                                      |
|                                                  | hsa-miR-27b     | 2843                     | 8                                      |
|                                                  | hsa-miR-424*    | 0                        | 1                                      |
|                                                  | hsa-miR-193b    | 1199                     | 5                                      |
|                                                  | hsa-miR-99b*    | 0                        | 0                                      |
|                                                  | hsa-let-7b      | 1570                     | 146                                    |
|                                                  | hsa-miR-181a    | 2340                     | 14                                     |
|                                                  | hsa-miR-23b     | 2280                     | 4                                      |
|                                                  | hsa-miR-361-5p  | 1629                     | 1                                      |
| hsa-miR-125b-2*                                  | 0               | 0                        |                                        |
| acute cellular rejection (down-regulated miRNAs) |                 | 22705 (8765)             | 219 (208)                              |
| <b>acute cellular rejection</b>                  |                 | <b>28878 (9833)</b>      | <b>387 (369)</b>                       |
| <b>ABMR versus PBx</b>                           |                 |                          |                                        |
| up-regulated                                     | hsa-miR-663     | 1145                     | 2                                      |
|                                                  | hsa-miR-146b-5p | 1855                     | 8                                      |
|                                                  | hsa-miR-1228    | 0                        | 0                                      |
|                                                  | hsa-let-7i      | 1569                     | 1                                      |
|                                                  | hsa-miR-21*     | 0                        | 0                                      |
|                                                  | hsa-miR-182     | 2305                     | 9                                      |
| <b>humoral rejection</b>                         |                 | <b>6874 (5119)</b>       | <b>20 (19)</b>                         |
| <b>acute rejection (total)</b>                   |                 | <b>35752 (10251)</b>     | <b>407 (384)</b>                       |

**Table S2.** The number of differentially regulated transcripts between control group and study groups. Raw data were obtained from the Cleveland study (Flechner et al.(1)) and the Edmonton study (Müller et al.(6)).

|                                                              | No. of up-regulated transcripts | No. of down-regulated transcripts | SAM delta value | fold change |
|--------------------------------------------------------------|---------------------------------|-----------------------------------|-----------------|-------------|
| <b>Cleveland study</b>                                       |                                 |                                   |                 |             |
| renal allograft dysfunction (n=5) versus controls (n=10)     | 67                              | 579                               | 3.5             | >2          |
| acute tubular necrosis (n=2) versus controls (n=10)          | 144                             | 284                               | 3.5             | >2          |
| acute rejection (n=7) versus controls (n=10)                 | 47                              | 389                               | 3.5             | >2          |
| <b>Edmonton study</b>                                        |                                 |                                   |                 |             |
| acute cellular rejection (n=28) versus no rejection (n=72)   | 430                             | 0                                 | 2               | >2          |
| antibody-mediated rejection (n=8) versus no rejection (n=72) | 105                             | 0                                 | 2               | >2          |

**Table S3.** Pathway enrichment analysis of the validation data set from Edmonton. Enriched pathways in the predicted and validated miRNA target lists in AREJ or ABMR and differentially regulated transcript lists are represented.

|                                                                   | predicted targets | exp. validated targets | regulated transcripts (SAM) |
|-------------------------------------------------------------------|-------------------|------------------------|-----------------------------|
| Pathways                                                          | p-value           | p-value                | p-value                     |
| <b>Acute cellular rejection</b>                                   |                   |                        |                             |
| Inflammation mediated by chemokine and cytokine signaling pathway | <0.001            | <0.001                 | <0.001                      |
| Apoptosis signaling pathway                                       | <0.001            | 0.007                  | <0.001                      |
| Interleukin signaling pathway                                     | <0.001            | 0.009                  | 0.004                       |
| Nicotinic acetylcholine receptor signaling pathway                | 0.001             | 0.009                  | 0.033                       |
| Cytoskeletal regulation by Rho GTPase                             | 0.002             | 0.009                  | 0.034                       |
| <b>Antibody-mediated rejection</b>                                |                   |                        |                             |
| Inflammation mediated by chemokine and cytokine signaling pathway | <0.001            | <0.001                 | 0.003                       |
| Interleukin signaling pathway                                     | 0.002             | <0.001                 | 0.018                       |
| Apoptosis signaling pathway                                       | <0.001            | 0.006                  | 0.005                       |

## qRT-PCR validation

### Methods

The TaqMan® MicroRNA Reverse Transcription Kit were used to synthesize single stranded cDNA. Real-time PCR was performed using the TaqMan® Gene Expression Master Mix, TaqMan® miRNA expression assays (see table below) with the ABI 7300 Real-Time PCR System. All instruments and reagents were purchased from Applied Biosystems. Relative gene expression values were evaluated with the  $2^{-\Delta\Delta C_t}$  method using U6 snRNA as control small RNA and Stratagene Universal human reference RNA (Stratagene, La Jolla, CA) as reference RNA. qRT-PCR conditions were set according to the manufacturer's recommendations: 10min 95°C, 40 cycles (15sec 95°C, 1min 60°C) with fluorescence reading during annealing step.

### TaqMan miRNA assays

| <b>Assay Name</b> | <b>miRBase ID</b> | <b>Mature miRNA Sequence</b> |
|-------------------|-------------------|------------------------------|
| hsa-miR-182       | hsa-miR-182-5p    | UUUGGCAAUGGUAGAACUCACACU     |
| hsa-miR-21*       | hsa-miR-21-3p     | CAACACCAGUCGAUGGGCUGU        |
| hsa-miR-155       | hsa-miR-155-5p    | UUA AUGCUAAUCGUGAUAGGGGU     |
| hsa-miR-146b      | hsa-miR-146b-5p   | UGAGAACUGAAUCCAUAGGCU        |
| hsa-miR-125a      | hsa-miR-125a-5p   | UCCCUGAGACCCUUUAACCUGUGA     |

### TaqMan miRNA assay control

| <b>Assay Name</b> | <b>NCBI Accession</b> | <b>Control Sequence</b>                                                                                                |
|-------------------|-----------------------|------------------------------------------------------------------------------------------------------------------------|
| U6 snRNA          | NR_004394             | GTGCTCGCTTCGGCAGCACATATACTAAAATT<br>GGAACGATACAGAGAAGATTAGCATGGCCCC<br>TGCGCAAGGATGACACGCAAATTCGTGAAGC<br>GTTCCATATTTT |

## DGF vs PBx

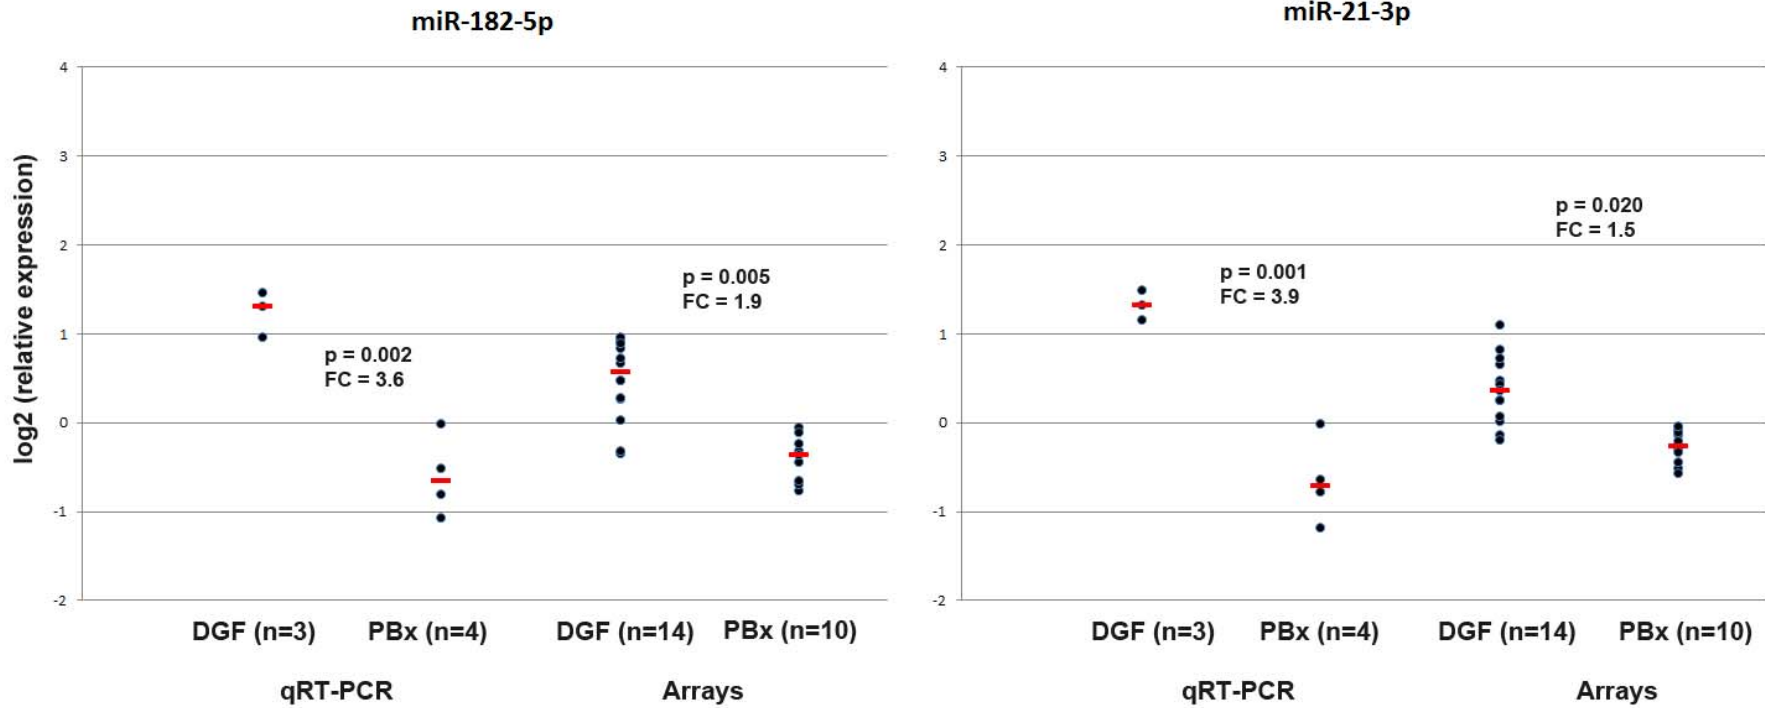

**Figure S1.** qRT-PCR validation of the most significantly differentially regulated miRNAs between DGF and control group (PBx). Log<sub>2</sub> (relative expression) values are shown for the qRT-PCR and the array experiment. The red line indicates the median.

## AREJ vs PBx

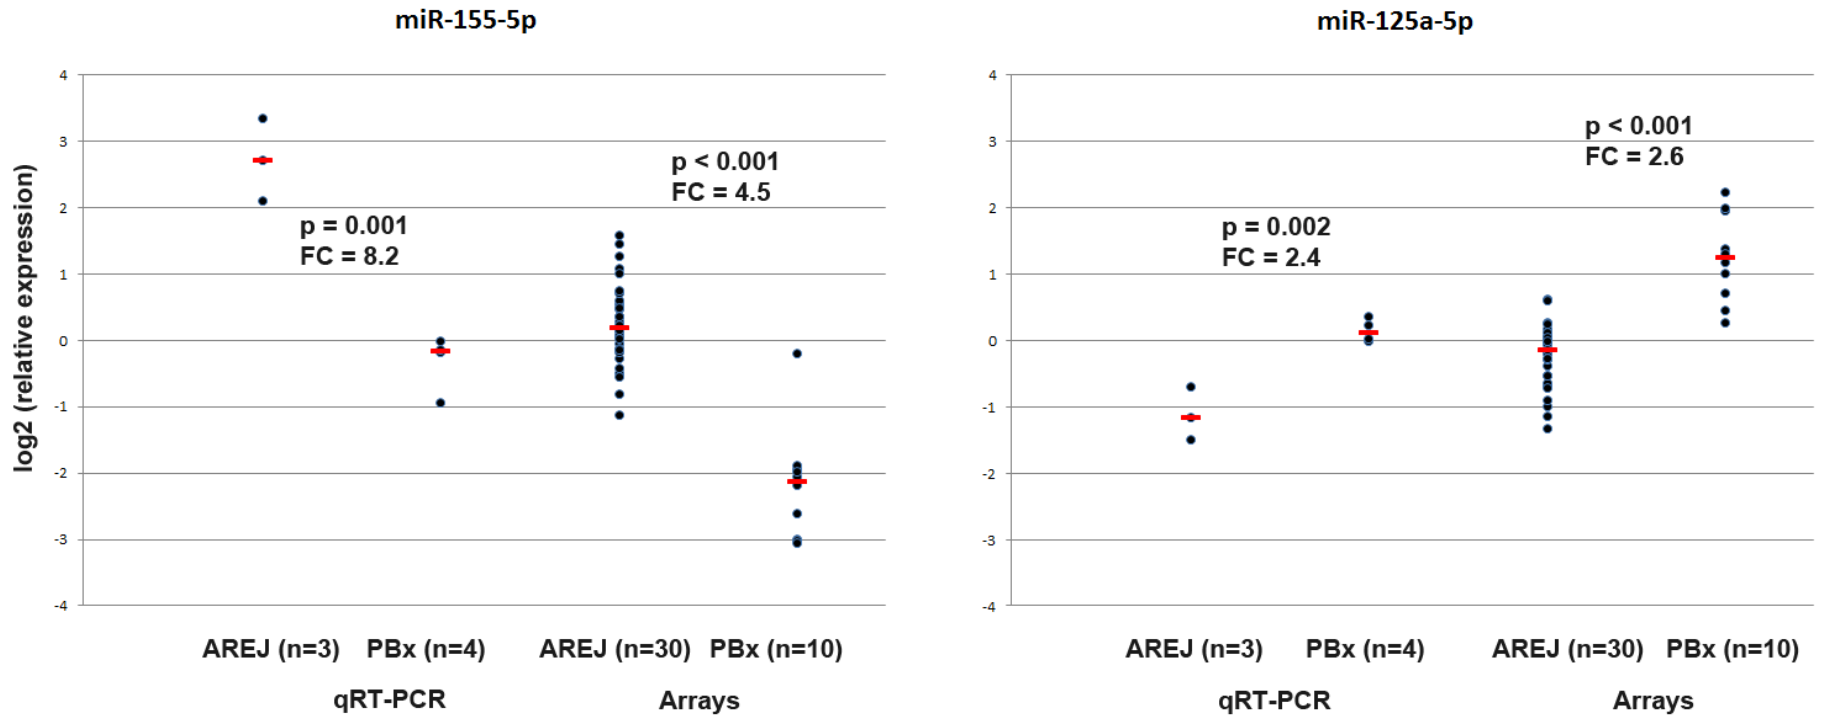

**Figure S2.** qRT-PCR validation of the most significantly differentially regulated miRNAs between AREJ and control group (PBx). Log<sub>2</sub> (relative expression) values are shown for the qRT-PCR and the array experiment. The red line indicates the median.



### ABMR vs PBx

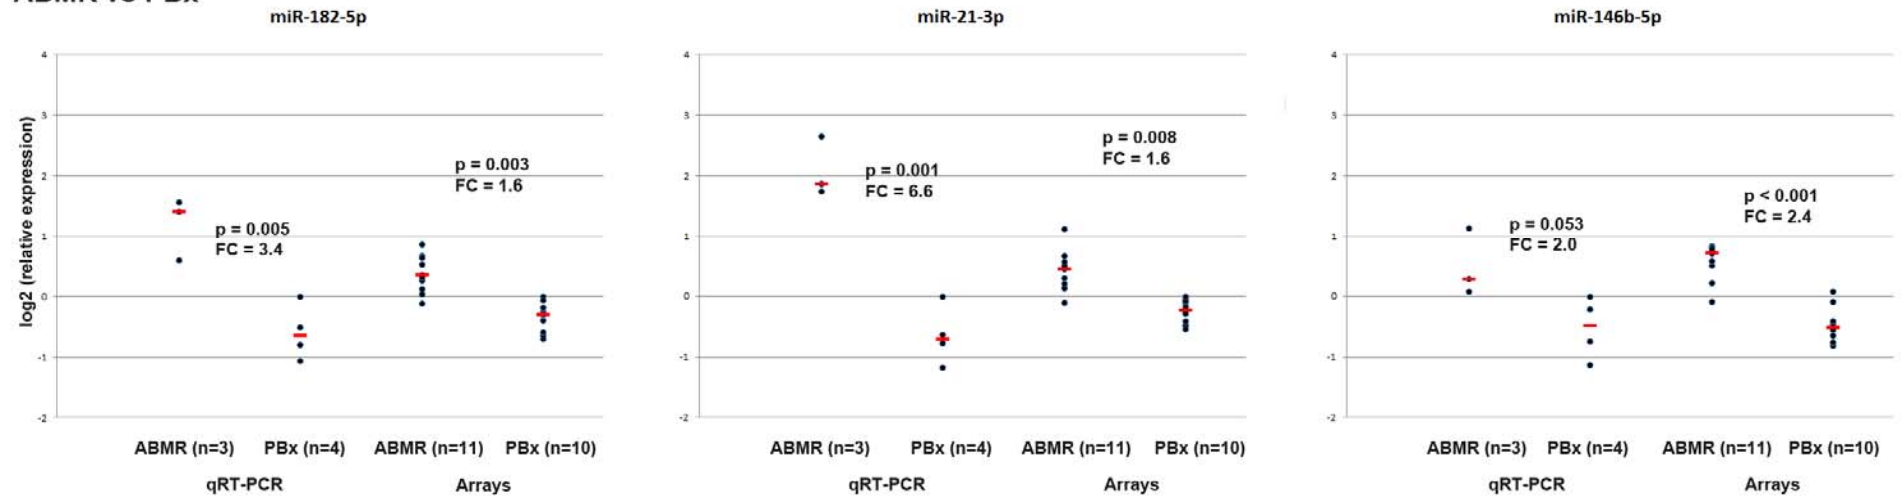

**Figure S3.** qRT-PCR validation of the most significantly differentially regulated miRNAs between ABMR and control group (PBx) or of miRNAs being also differentially regulated in other groups. Log<sub>2</sub> (relative expression) values are shown for the qRT-PCR and the array experiment. The red line indicates the median.

## References

1. Flechner SM, Kurian SM, Head SR, et al. Kidney transplant rejection and tissue injury by gene profiling of biopsies and peripheral blood lymphocytes. *Am J Transplant* 2004; 4 (9): 1475.
2. Wilson, Miller. Simpleaffy: a BioConductor package for Affymetrix quality control and data analysis. *Bioinformatics* 2005.
3. Irizarry RA, Hobbs B, Collin F, et al. Exploration, normalization, and summaries of high density oligonucleotide array probe level data. *Biostatistics* 2003; 4 (2): 249.
4. Saint-Mezard P, Berthier CC, Zhang H, et al. Analysis of independent microarray datasets of renal biopsies identifies a robust transcript signature of acute allograft rejection. *Transpl Int* 2009; 22 (3): 293.
5. Sarwal M, Chua MS, Kambham N, et al. Molecular heterogeneity in acute renal allograft rejection identified by DNA microarray profiling. *N Engl J Med* 2003; 349 (2): 125.
6. Mueller TF, Einecke G, Reeve J, et al. Microarray analysis of rejection in human kidney transplants using pathogenesis-based transcript sets. *Am J Transplant* 2007; 7 (12): 2712.
